# Supplementary material for: In Vitro Effects of the Endocrine Disruptor p,p’-DDT on Human Follitropin Receptor
Source: PubMed Central journal article supplement (PMC4937862; doi:10.1289/ehp.1510006), 2016-02-19
Supplement: ehp.1510006.s001.acco.pdf [file ehp.1510006.s001.acco.pdf]

**Note to readers with disabilities:** *EHP* strives to ensure that all journal content is accessible to all readers. However, some figures and Supplemental Material published in *EHP* articles may not conform to [508 standards](#) due to the complexity of the information being presented. If you need assistance accessing journal content, please contact [ehp508@niehs.nih.gov](mailto:ehp508@niehs.nih.gov). Our staff will work with you to assess and meet your accessibility needs within 3 working days.

## **Supplemental Material**

### ***In Vitro* Effects of the Endocrine Disruptor p,p'DDT on Human Follitropin Receptor**

Mathilde Munier, Julie Grouleff, Louis Gourdin, Mathilde Fauchard, Vanessa

Chantreau, Daniel Henrion, Régis Coutant, Birgit Schiøtt, Marie Chabbert, and Patrice

Rodien

#### **Table of Contents**

**Figure S1.** Cell survival was measured by an MTT assay. Cells were incubated with p,p'DDT  $5 \cdot 10^{-6}$  M or p,p'DDE  $10^{-5}$  M or o,p'DDT  $10^{-5}$  M or BPA  $10^{-5}$  M for 30, 60 or 120 min. At the end of the incubation time, MTT (0,5 mg/mL) was added. The formazan coloration at 570 nm was measured. The results are expressed as percentage of viability compared to cells in absence of p,p'DDE or o,p'DDT (means  $\pm$  SEM of three independent experiments performed in triplicate).

**Figure S2.** Structure of molecules.

**Figure S3.** The mutants FSHR T3.32A, T3.32I, H7.42A, T3.32I-H7.42A and the WT transiently expressed in CHO cells. The cell surface expression was determined by flow cytometry. Cells were incubated for 30 min with a 1:10 mouse anti-FSHR antibody. Then they were washed once and incubated for 30 min with a 1:20 FITC-conjugated goat anti-mouse antibody. Flow cytometry measurements were performed on MACSQuant from Miltenyi Biotech (Bergish Gladbach, Deutschland). Expression of mutated receptors is given as a mean of fluorescence intensity (MFI). Cells were stimulated for 30 min with increasing FSH concentrations and the cAMP production measured.

**Figure S4.** Dose response curve of forskolin (FSK) on CHO or CHO-FSHR cells (means  $\pm$  SEM of four independent experiments performed in triplicate). The cAMP concentration measured in presence of forskolin on CHO is arbitrarily set at 100%.

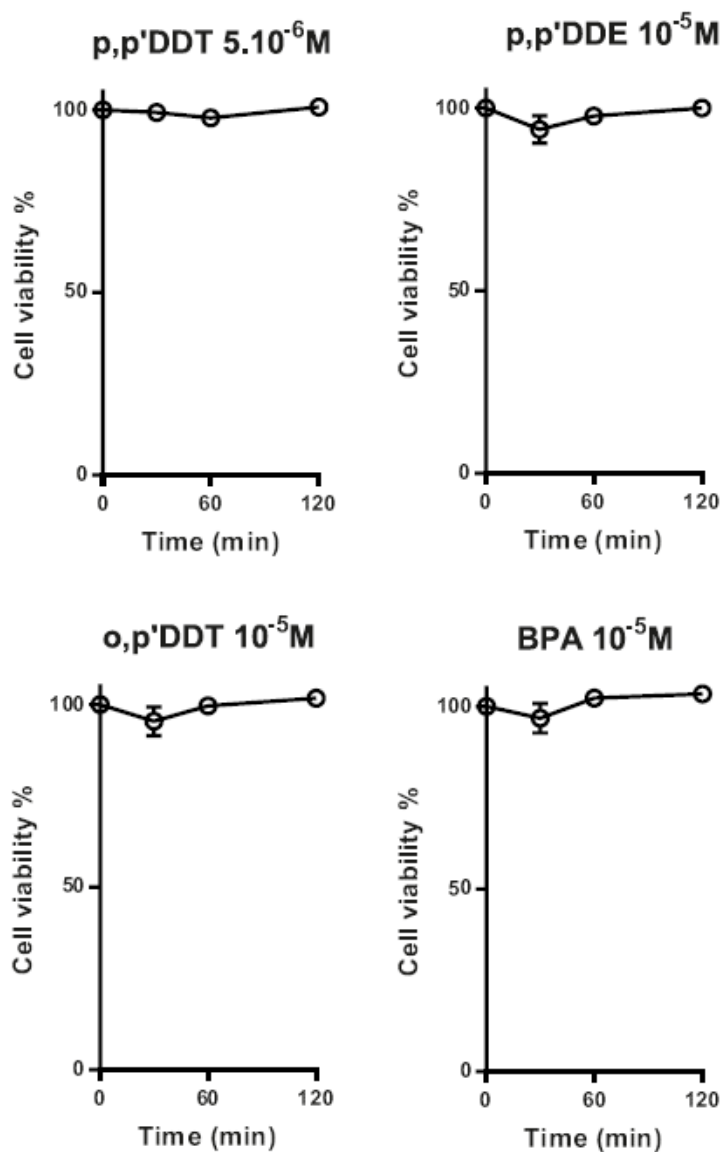

Figure S1

Cell survival was measured by an MTT assay. Cells were incubated with p,p'DDT 5.10<sup>-6</sup>M or p,p'DDE 10<sup>-5</sup>M or o,p'DDT 10<sup>-5</sup>M or BPA 10<sup>-5</sup>M for 30, 60 or 120 min. At the end of the incubation time, MTT (0,5 mg/mL) was added. The formazan coloration at 570 nm was measured. The results are expressed as percentage of viability compared to cells in absence of p,p'DDE or o,p'DDT (means ± SEM of three independent experiments performed in triplicate).

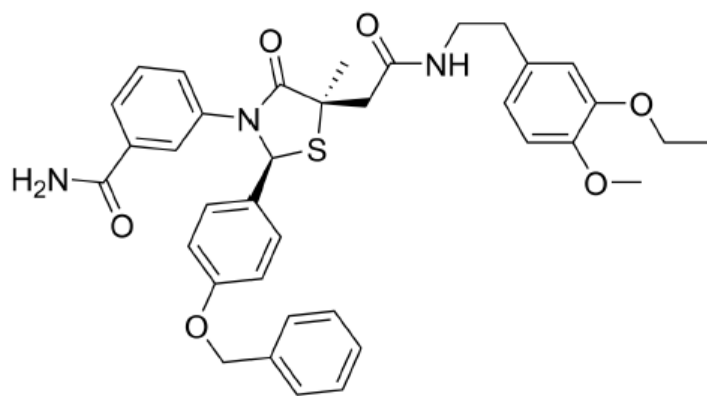

16a

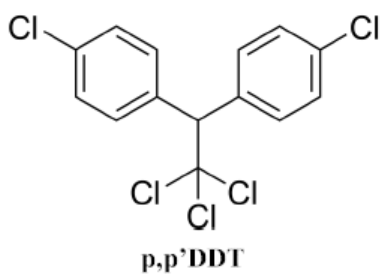

p,p'-DDT

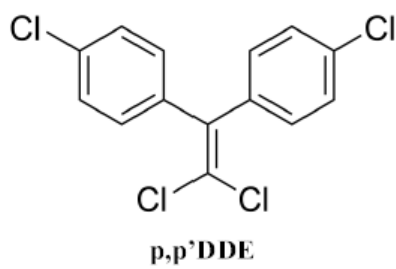

p,p'-DDE

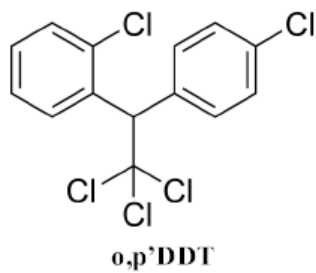

o,p'-DDT

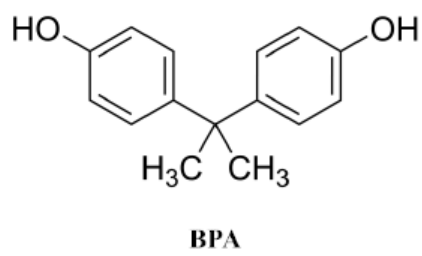

BPA

Figure S2

Structure of molecules

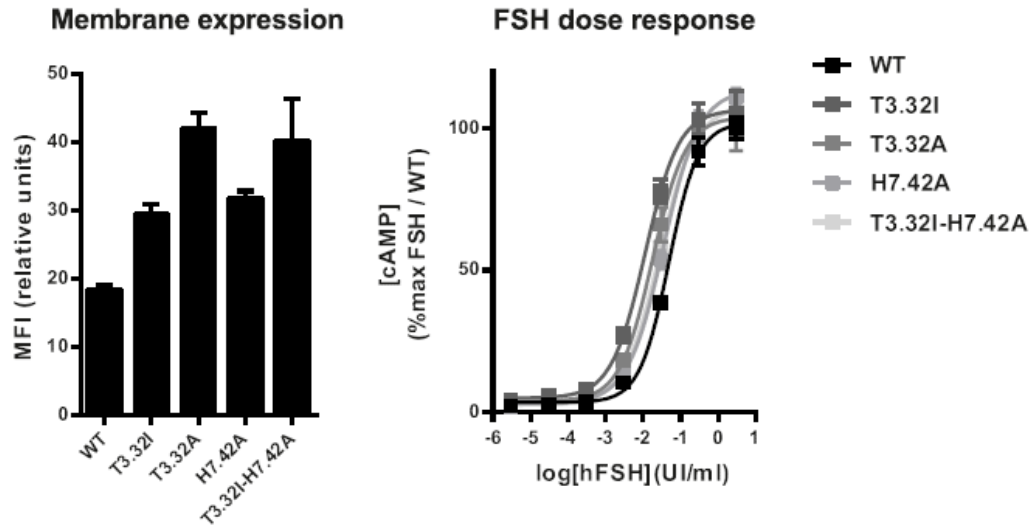

Figure S3

The mutants FSHR T3.32A, T3.32I, H7.42A, T3.32I-H7.42A and the WT transiently expressed in CHO cells. The cell surface expression was determined by flow cytometry. Cells were incubated for 30 min with a 1:10 mouse anti-FSHR antibody. Then they were washed once and incubated for 30 min with a 1:20 FITC-conjugated goat anti-mouse antibody. Flow cytometry measurements were performed on MACSQuant from Miltenyi Biotech (Bergish Gladbach, Deutschland). Expression of mutated receptors is given as a mean of fluorescence intensity (MFI). Cells were stimulated for 30 min with increasing FSH concentrations and the cAMP production measured.

### Forskolin dose response

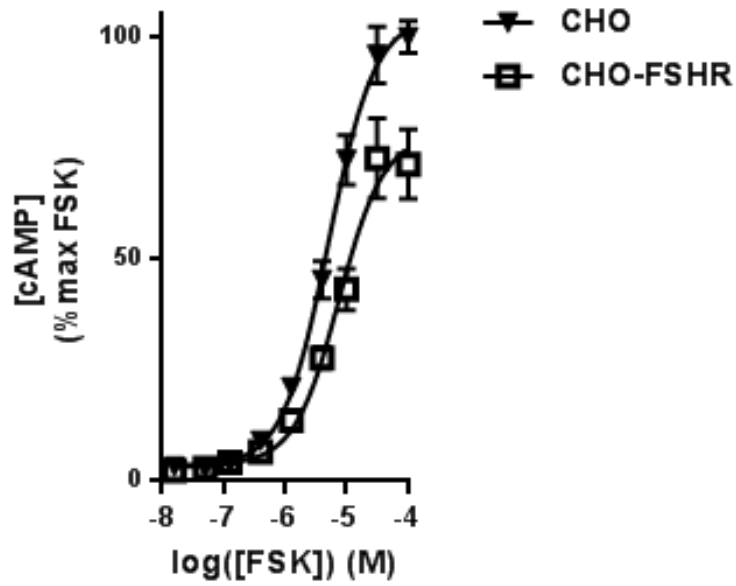

Figure S4

Dose response curve of forskolin (FSK) on CHO or CHO-FSHR cells (means  $\pm$  SEM of four independent experiments performed in triplicate). The cAMP concentration measured in presence of forskolin on CHO is arbitrarily set at 100%.
